# Supplementary material for: The Assessment, Management and Prevention of Calf Muscle Strain Injuries: A Qualitative Study of the Practices and Perspectives of 20 Expert Sports Clinicians
Source: PubMed Central journal article supplement (PMC8761182; doi:10.1186/s40798-021-00364-0), 2022-01-15
Supplement: 40798_2021_364_MOESM1_ESM.pdf [file 40798_2021_364_MOESM1_ESM.pdf]

# **The assessment, management and prevention of calf muscle strain injuries: A qualitative study of the practices and perspectives of 20 expert sports clinicians**

## **Sports Medicine - Open**

Brady Green<sup>1</sup>, Jodie A McClelland<sup>1</sup>, Adam I Semciw<sup>1,2</sup>, Anthony G Schache<sup>1</sup>, Alan McCall<sup>3,4</sup>, and Tania Pizzari<sup>1</sup>

<sup>1</sup>La Trobe Sport and Exercise Medicine Research Centre, La Trobe University, Melbourne, Australia

<sup>2</sup>Northern Centre for Health Education and Research, Northern Health, Victoria, Australia

<sup>3</sup>Arsenal Performance and Research Team, Arsenal Football Club, the United Kingdom

<sup>4</sup>School of Applied Sciences, Edinburgh-Napier University, United Kingdom

### **Corresponding author details:**

Mr Brady Green  
La Trobe Sport and Exercise Medicine Research Centre  
La Trobe University, Melbourne, Australia  
E: B.Green2@latrobe.edu.au  
ORCID: <https://orcid.org/0000-0003-1135-0033>

**Mailing address**

La Trobe University  
Victoria 3086 Australia

T + 61 3 9479 5815

E: [asklatrobe@latrobe.edu.au](mailto:asklatrobe@latrobe.edu.au)

[www.latrobe.edu.au/health](http://www.latrobe.edu.au/health)

**MELBOURNE CAMPUSES**

Bundoora  
Collins Street CBD  
Franklin Street CBD

**REGIONAL CAMPUSES**

Bendigo  
Albury-Wodonga  
Mildura  
Shepparton

## **Interview Schedule of Questions (HEC18060)**

The interview will broadly cover the diagnosis, management, and prevention of calf strain injuries in athletes. The following schedule of questions is intended as a **guide** only, to ensure that all relevant areas are covered by the interviewer.

- Take me through how you would make the diagnosis of a calf muscle injury.
  - Subjective:
    - Mechanism / history of presenting condition
    - Past history
    - Aggravating factors
  - Examination
  - Investigations
  - Grade of the injury
  - Differential diagnosis
  
- Take me through your current management of a calf muscle injury (for each grade).
  - Acute management
    - Passive: manual techniques
    - Active: early exercises
  - Post acute
    - Passive: manual techniques
    - Active: exercises
    - Areas most important to address during rehab
  
- Return to activity, including running program
  - Early running program
  - Approach to progressing running (volume, intensity)

- What criteria do you use to identify readiness to return to sport?
- What techniques do you use in an attempt to prevent subsequent calf muscle injury?
- Can anything be done to prevent first time calf muscle injuries? (Current screening and monitoring that may be useful)
- Anecdotally, have you identified any predictors for calf muscle injuries?
